# Supplementary material
Source: Royal Society of Chemistry journal article supplement (doi:10.1039/d6dt00551a)
Supplement: d6dt00551a1.pdf [file d6dt00551a1.pdf]

## SUPPORTING INFORMATION

### **Rational Design of BODIPY Functionalized MOF Photocatalysts for Highly Efficient Hydrogen Production**

Zehra Coşkun<sup>a</sup>, Elif Yıldız Gül<sup>a,b</sup>, Burcu Topaloğlu Aksoy<sup>a</sup>, Azam Seifi<sup>c</sup>, Esra Tanrıverdi Eçik<sup>b</sup>,

Bünyemin Çoşut<sup>\*a</sup>

<sup>a</sup>Department of Chemistry, Gebze Technical University, 41400, Gebze, Türkiye

<sup>b</sup>Department of Chemistry, Atatürk University, 25240, Erzurum, Türkiye

<sup>c</sup>Department of Environmental Engineering, Kocaeli University, Türkiye

\* Author for correspondence:

Dr. Bünyemin Çoşut, Department of Chemistry, Gebze Technical University, Gebze 41400,  
Kocaeli, Turkey

Tel: 00 90 262 6053015

Fax: 00 90 262 6053105

e-mail: [bcosut@gtu.edu.tr](mailto:bcosut@gtu.edu.tr)

## TABLE OF CONTENTS

|                                                                                                      |    |
|------------------------------------------------------------------------------------------------------|----|
| <b>Fig. S1:</b> Synthesis of BD1, BD2, BD3, BD4 and UiO-66-NH <sub>2</sub>                           | 3  |
| <b>Synthesis of BD1</b>                                                                              | 4  |
| <b>Synthesis of BD3</b>                                                                              | 4  |
| <b>Synthesis of UiO-66-NH<sub>2</sub></b>                                                            | 5  |
| <b>Fig. S2:</b> The <sup>1</sup> H NMR spectrum of BD1                                               | 6  |
| <b>Fig. S3:</b> The <sup>13</sup> C NMR spectrum of BD1                                              | 6  |
| <b>Fig. S4:</b> The <sup>1</sup> H NMR spectrum of BD3                                               | 7  |
| <b>Fig. S5:</b> The <sup>13</sup> C NMR spectrum of BD3                                              | 7  |
| <b>Fig. S6:</b> The MALDI TOF mass spectrum of BD2                                                   | 8  |
| <b>Fig. S7:</b> The <sup>1</sup> H NMR spectrum of BD2                                               | 8  |
| <b>Fig. S8:</b> The <sup>13</sup> C NMR spectrum of BD2                                              | 9  |
| <b>Fig. S9:</b> The MALDI TOF mass spectrum of BD4                                                   | 9  |
| <b>Fig. S10:</b> The <sup>1</sup> H NMR spectrum of BD4                                              | 10 |
| <b>Fig. S11:</b> The <sup>13</sup> C NMR spectrum of BD4                                             | 10 |
| <b>Fig. S12:</b> FT-IR spectrums of (A) BD2/UiO-66-NH <sub>2</sub> , (B) BD4/UiO-66-NH <sub>2</sub>  | 11 |
| <b>Fig. S13:</b> HRTEM images of UiO-66-NH <sub>2</sub> (A) 10 nm, (B) 20 nm, (C) 200 nm, (D) 500 nm | 12 |
| <b>Fig. S14:</b> HRTEM images of BD4/UiO-66-NH <sub>2</sub> (A) 10 nm, (B) 20 nm, (C) 100 nm         | 12 |
| <b>Fig. S15:</b> Absorbance and reflectance spectrums of UiO-66-NH <sub>2</sub>                      | 13 |
| <b>Fig. S16:</b> Absorbance and reflectance spectrums of BD2/UiO-66-NH <sub>2</sub>                  | 13 |
| <b>Fig. S17:</b> Absorbance and reflectance spectrums of BD4/UiO-66-NH <sub>2</sub>                  | 14 |
| <b>Fig. S18:</b> FTIR spectrums of BD4/UiO-66-NH <sub>2</sub> (A) before HER, (B) after HER          | 14 |
| <b>Fig. S19:</b> PXRD pattern of BD4/UiO-66-NH <sub>2</sub> (A) before HER, (B) after HER            | 15 |

**Fig. S20:** SEM images of BD4/UiO-66-NH<sub>2</sub> (A) before HER, (B) after HER

15

**Fig. S21:** H<sub>2</sub> Evolution Comparison of BD4 and BD4/UiO-66-NH<sub>2</sub>

16

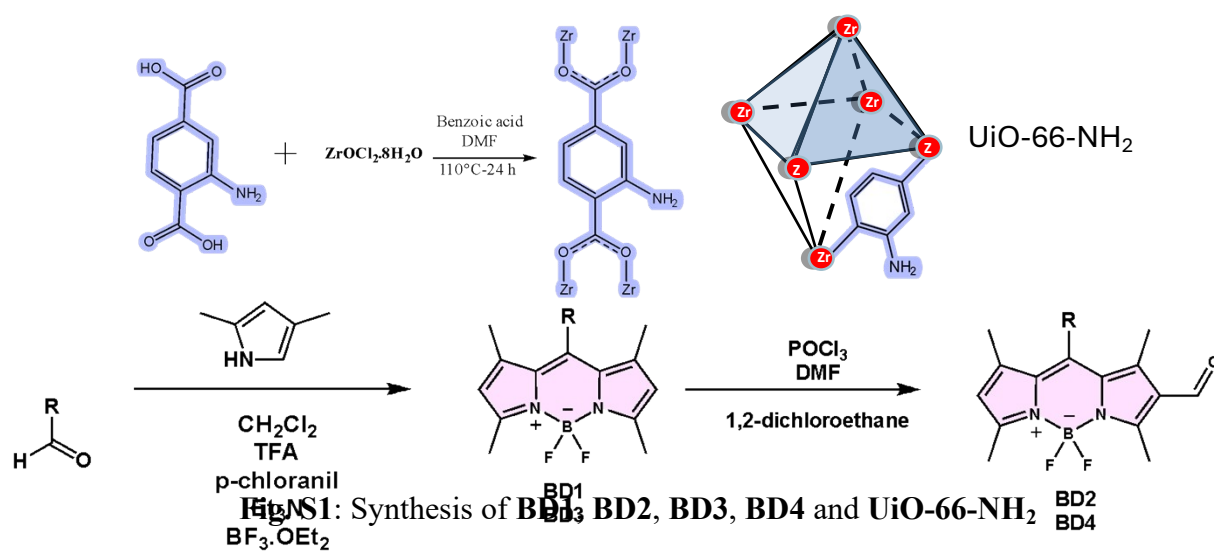

**Fig. S1:** Synthesis of **BD1**, **BD2**, **BD3**, **BD4** and **UiO-66-NH<sub>2</sub>**

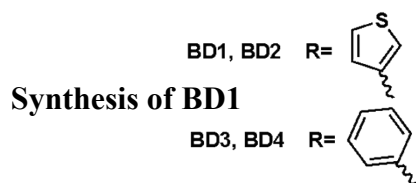

BD1 was synthesized according to the literature (38). 2,4-dimethylpyrrole (1 mL, 9.7 mmol) was added in the reaction flask after 200 mL of CH<sub>2</sub>Cl<sub>2</sub> was purged with Ar for 30 min. Then, the reaction medium was purged with Ar for additional 10 min. 3-thiophenecarboxaldehyde (0.40 mL, 4.6 mmol) was added to the reaction medium. A few drops of trifluoroacetic acid was added later. The mixture was allowed to stir under Ar atm at room temperature for 3 hours. p-chloranil (1.13 g, 4.6 mmol) was added and the reaction mixture was stirred for 2 hours. 5 mL of Et<sub>3</sub>N and 5 mL BF<sub>3</sub>.OEt<sub>2</sub> was added to the reaction mixture dropwise, respectively. The reaction mixture was allowed to stir at room temperature for 3 hours and was extracted with water and organic layer was dried using Na<sub>2</sub>SO<sub>4</sub>. The crude product was purified by silica gel column chromatography using n-hexane:CH<sub>2</sub>Cl<sub>2</sub> (3:1) as eluent to give **BD1** (orange solid, 200 mg, 13%) (Fig. S1). <sup>1</sup>H NMR (400 MHz, CDCl<sub>3</sub>) δ<sub>H</sub> (ppm): 7.41 (m, 1H, Ar-H), 7.11 (m, 1H, Ar-H), 6.89 (m, 1H, Ar-H), 5.91 (s, 2H, Ar-H), 2.47 (s, 6H, -CH<sub>3</sub>), 1.42 (s, 6H, -CH<sub>3</sub>) (Fig. S2). <sup>13</sup>C NMR (101 MHz, CDCl<sub>3</sub>) δ<sub>C</sub> (ppm): 155.53, 143.14, 137.00, 134.50, 131.76, 127.48, 127.39, 123.78, 121.19, 14.61, 13.70 (Fig. S3).

### Synthesis of **BD3**

BD3 was synthesized according to the literature (39). 2,4-dimethylpyrrole (1 mL, 9.7 mmol) was added in the reaction flask after 200 mL of CH<sub>2</sub>Cl<sub>2</sub> was purged with Ar for 30 min. Then, the reaction medium was purged with Ar for an additional 10 min. Benzaldehyde (0.45 mL, 4.4 mmol) was added to the reaction medium. A few drops of trifluoroacetic acid were added later. The mixture was allowed to stir under Ar atm at room temperature for 3 hours. p-chloranil (1.08 g, 4.4 mmol) was added and the reaction mixture was stirred for 2 hours. 5 mL of Et<sub>3</sub>N and 5 mL BF<sub>3</sub>.OEt<sub>2</sub> was added to the reaction mixture dropwise respectively. The reaction mixture was allowed to stir at room temperature for 3 hours and was extracted with water and organic layer was dried using Na<sub>2</sub>SO<sub>4</sub>. The crude product was purified by silica gel column chromatography using n-

hexane:CH<sub>2</sub>Cl<sub>2</sub> (3:1) as eluent to **BD3** (orange solid, 200 mg, 13%). <sup>1</sup>H NMR (400 MHz, CDCl<sub>3</sub>) δ<sub>H</sub> (ppm): 7.51 (m, 3H) (Ar-H), 7.30 (m, 2H) (Ar-H), 6.00 (s, 2H) (Ar-H), 2.58 (s, 6H) (-CH<sub>3</sub>), 1.39 (s, 6H) (-CH<sub>3</sub>) (Fig. S4). <sup>13</sup>C NMR (101 MHz, CDCl<sub>3</sub>) δ<sub>C</sub> (ppm): 155.42, 143.17, 141.74, 134.99, 131.43, 129.14, 128.95, 127.93, 121.22, 14.60, 14.36 (Fig. S5).

### Synthesis of UiO-66-NH<sub>2</sub>

UiO-66-NH<sub>2</sub> was synthesized according to the literature with some modifications (40). Initially, 1.5 g (4.65 mmol) of ZrOCl<sub>2</sub>·8H<sub>2</sub>O, 1.0 g (5.52 mmol) of NH<sub>2</sub>-BDC, and 25.0 g (204.7 mmol) of benzoic acid were placed into a 250 mL glass bottle. Subsequently, 100 mL of DMF was added, and the mixture was sonicated in an ultrasonic bath until the solid components had completely dissolved, yielding a homogeneous solution. The reaction mixture was then placed in an oven and kept at 110°C for 24 hours. Upon completion of the reaction, the product was collected by centrifugation and thoroughly washed with DMF and acetone to remove unreacted residues and by-products. Finally, the material was dried overnight in an oven at 60°C, followed by additional drying under vacuum at 100°C. The resulting product was then subjected to characterization analyses.

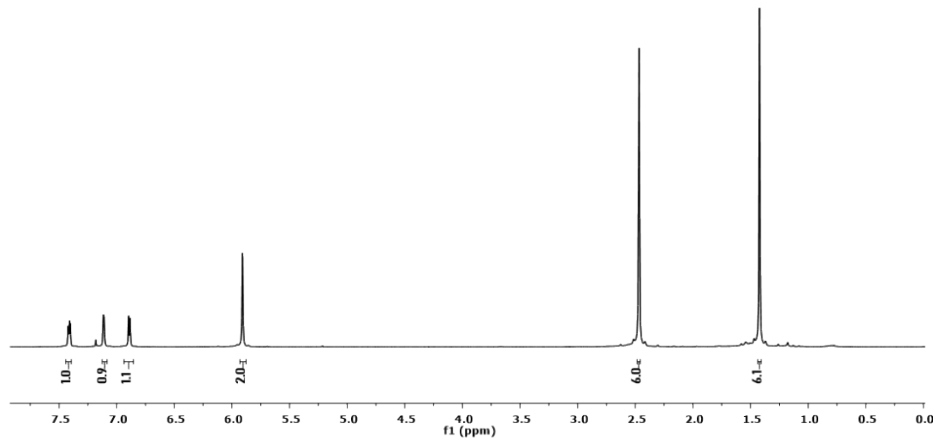

**Fig. S2:** The <sup>1</sup>H NMR spectrum of **BD1**

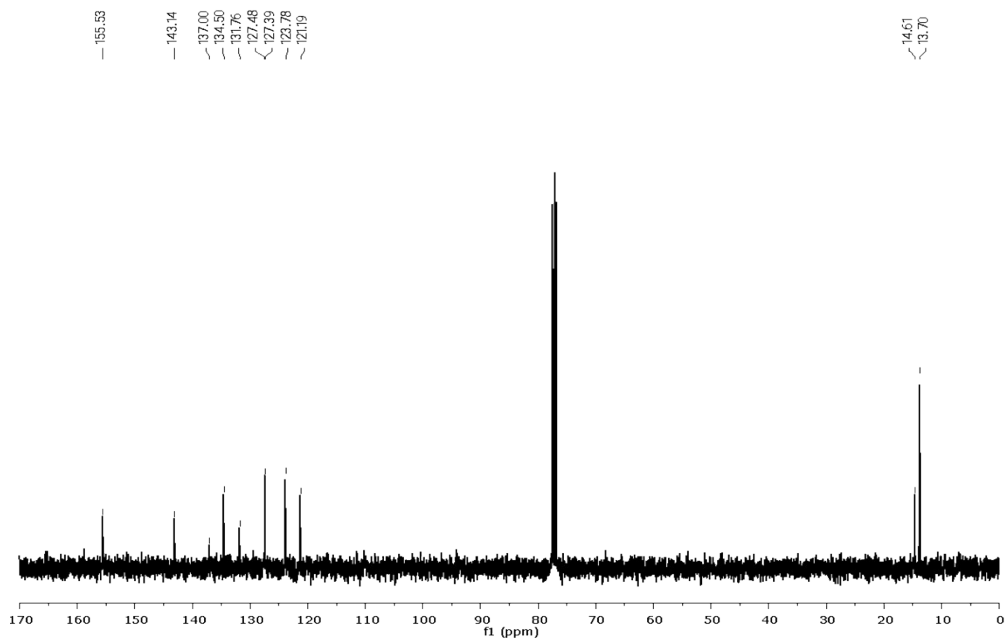

**Fig. S3:** The <sup>13</sup>C NMR spectrum of **BD1**

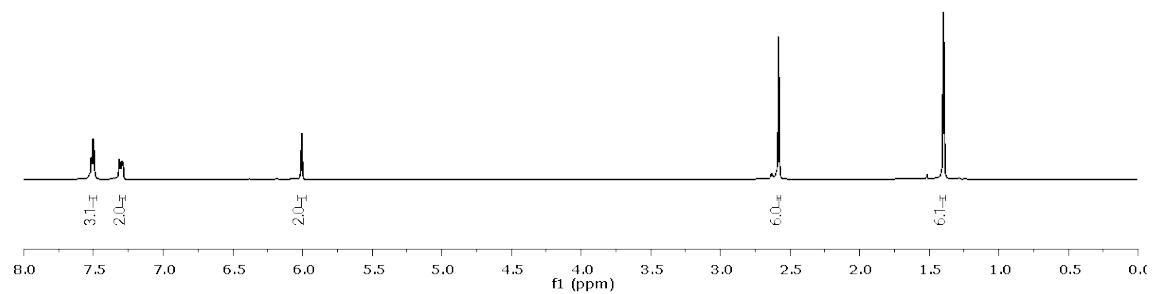

**Fig. S4:** The  $^1\text{H}$  NMR spectrum of **BD3**

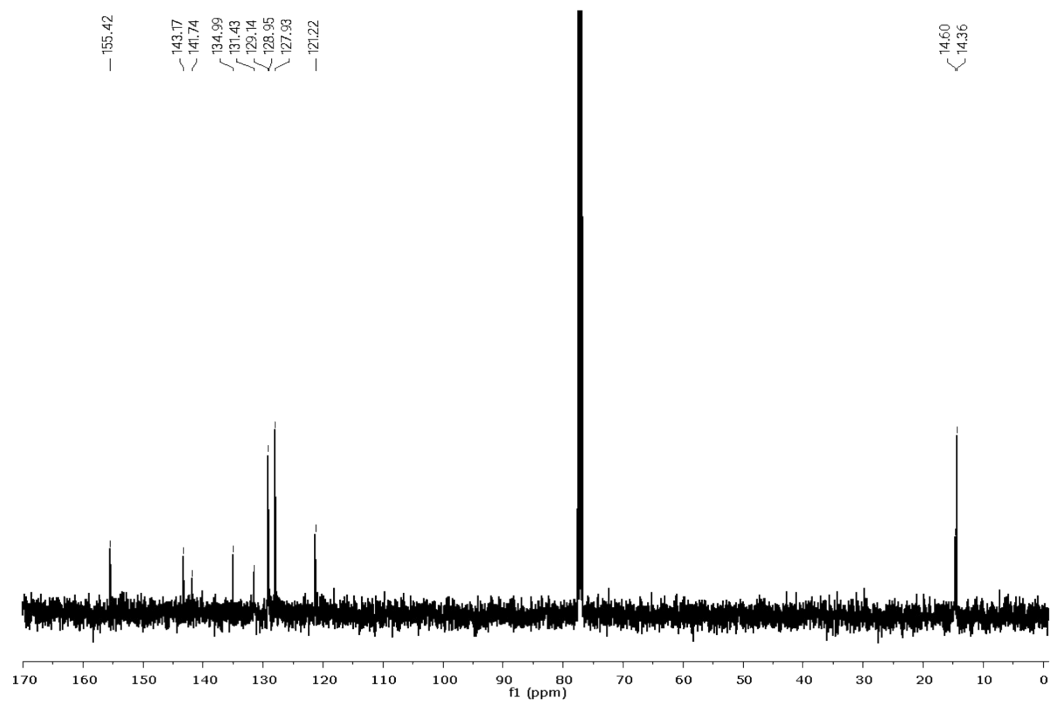

**Fig. S5:** The  $^{13}\text{C}$  NMR spectrum of **BD3**

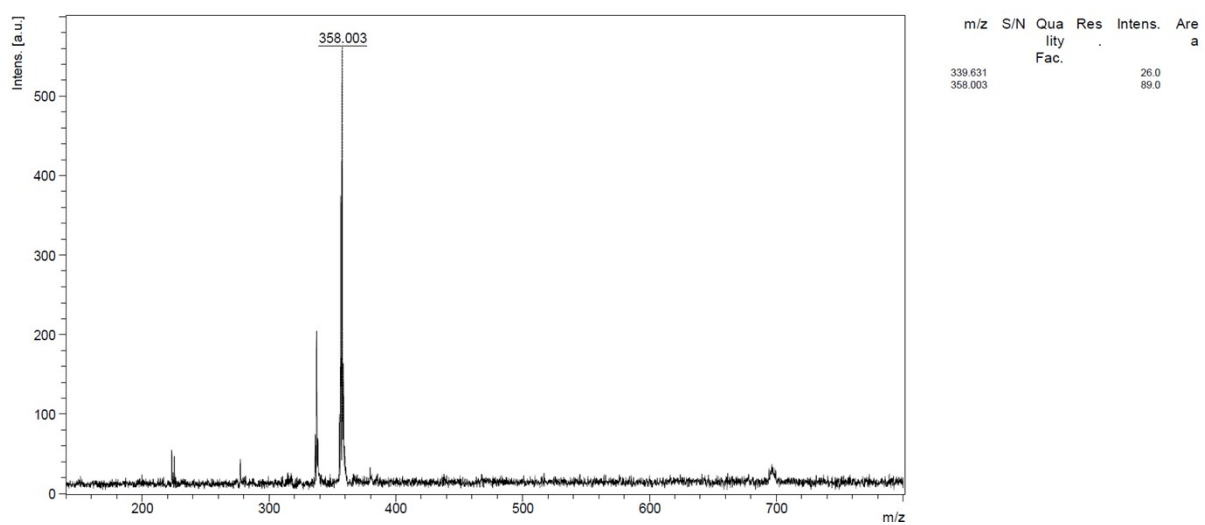

**Fig. S6:** The MALDI TOF mass spectrum of **BD2**

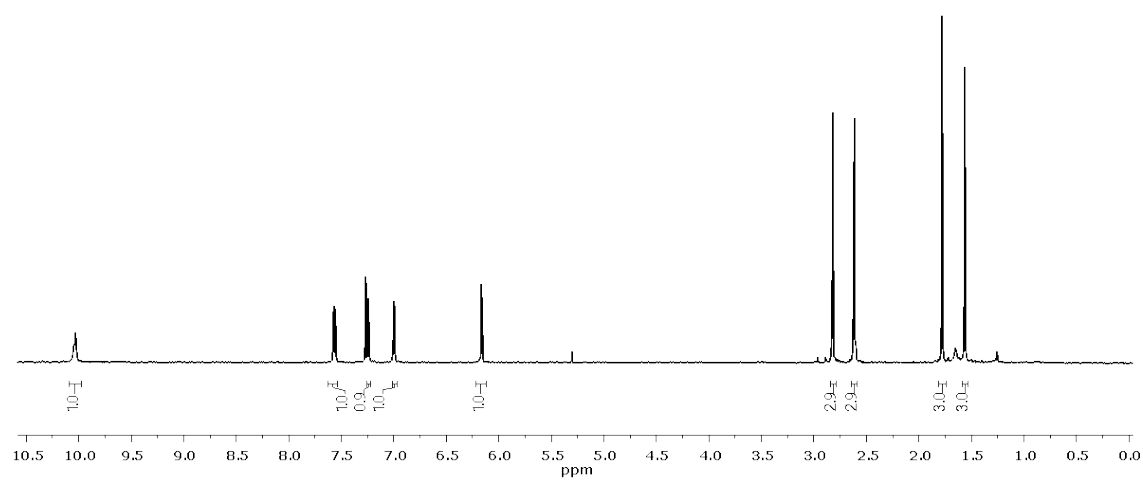

**Fig. S7:** The  $^1\text{H}$  NMR spectrum of **BD2**

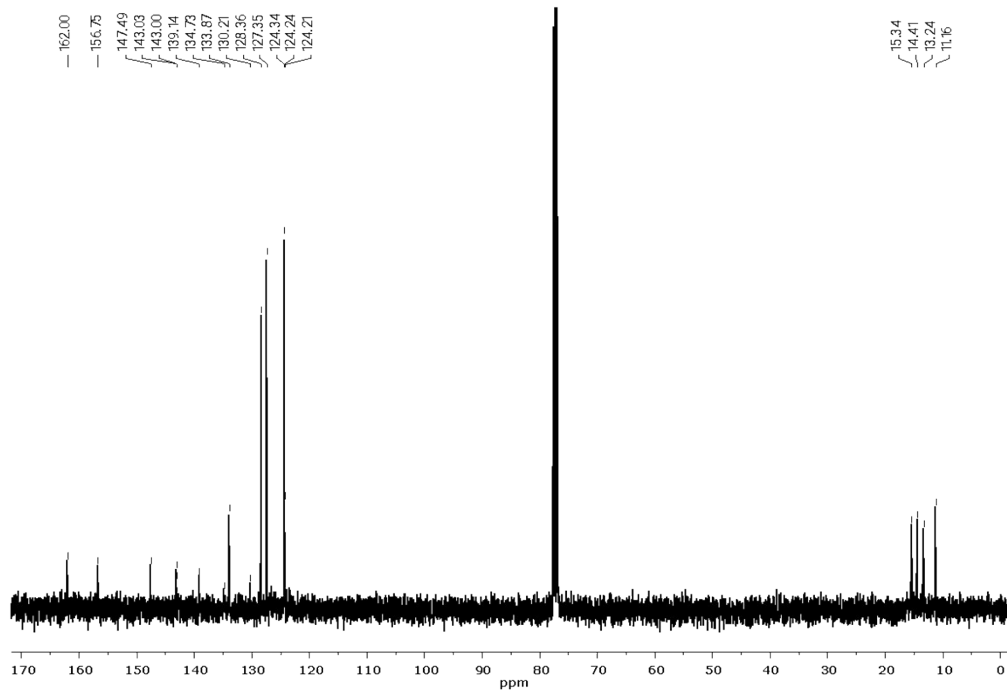

**Fig. S8:** The  $^{13}\text{C}$  NMR spectrum of **BD2**

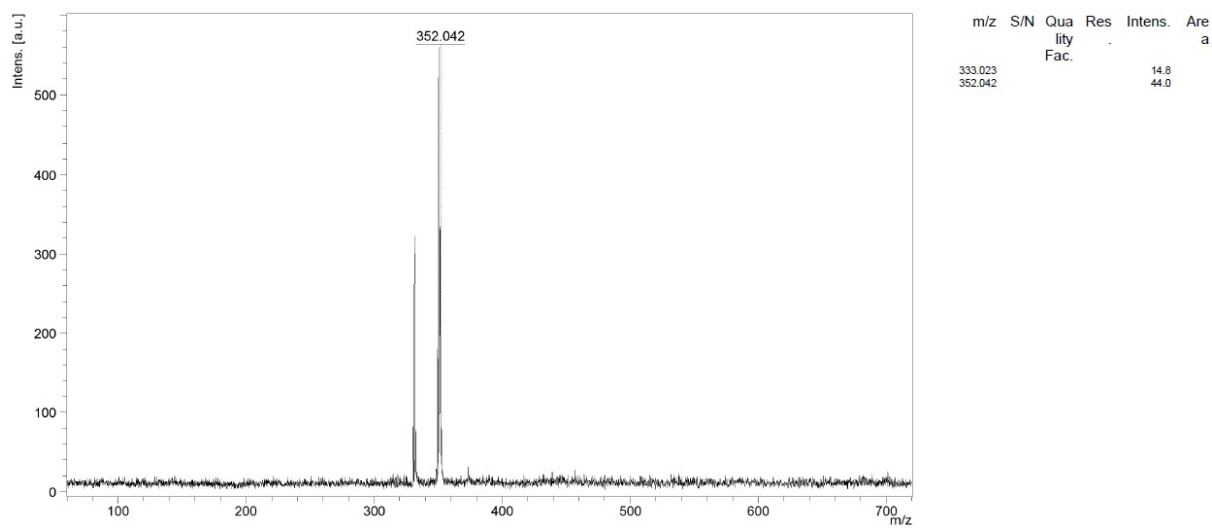

**Fig. S9:** The MALDI TOF mass spectrum of **BD4**

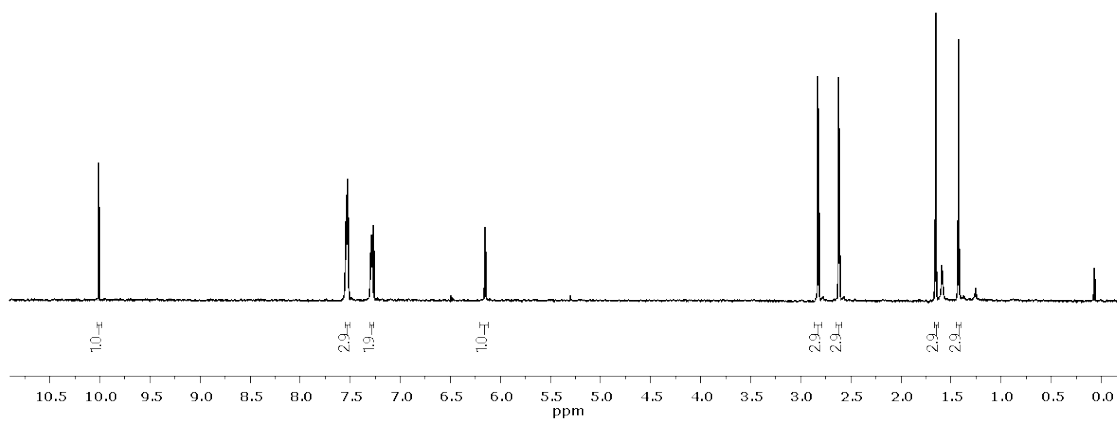

**Fig. S10:** The  $^1\text{H}$  NMR spectrum of **BD4**

**Fig. S11:** The  $^{13}\text{C}$  NMR spectrum of **BD4**

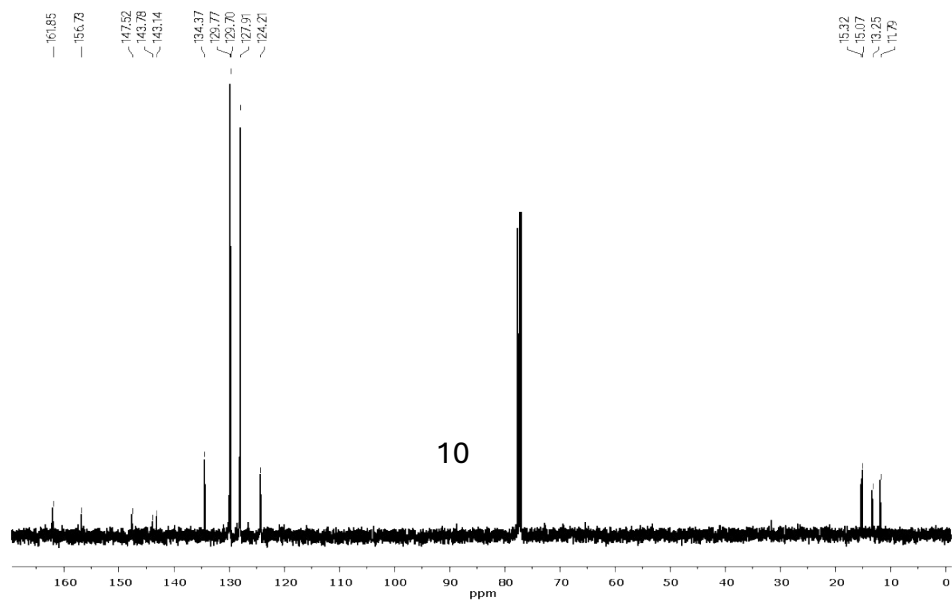

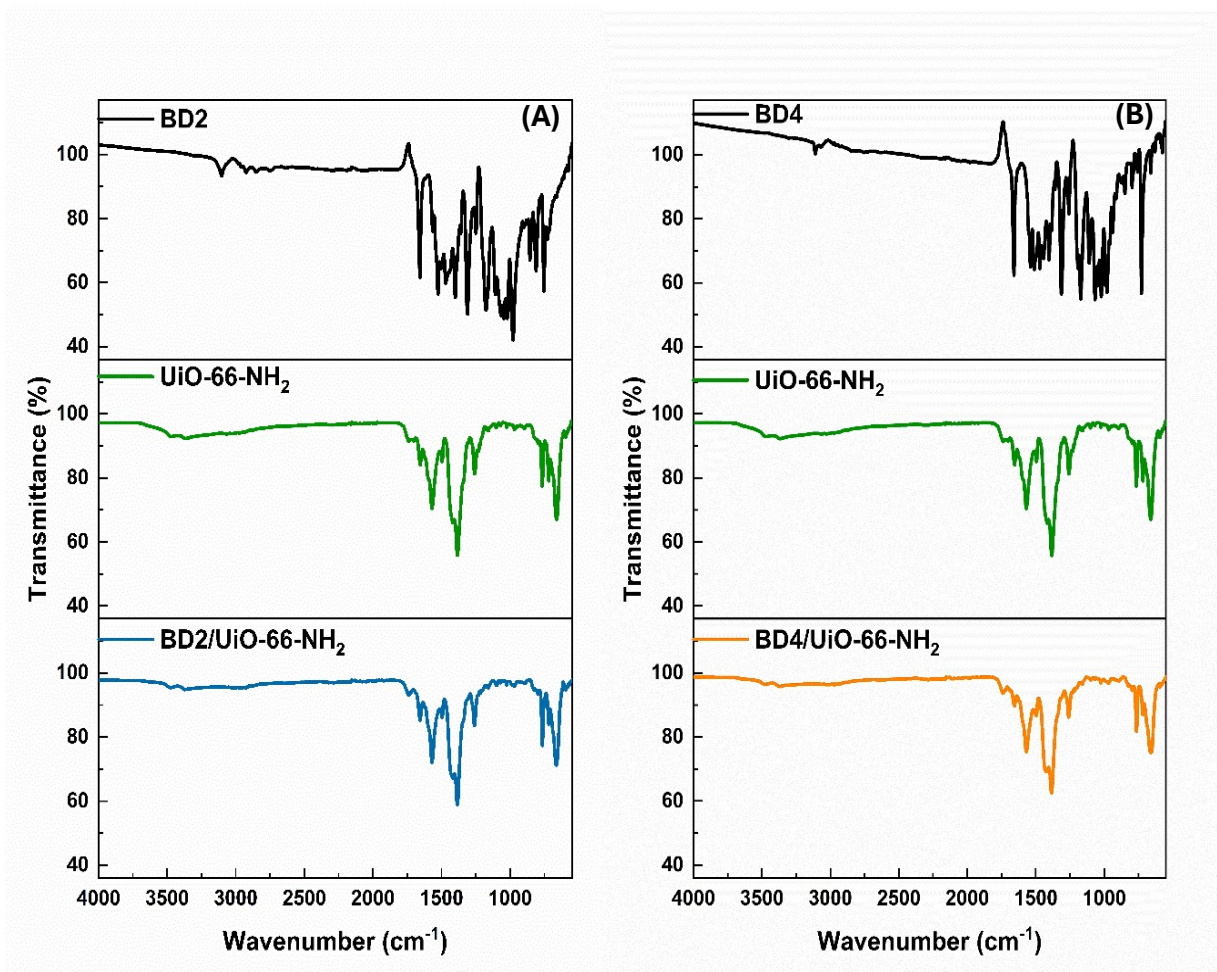

**Fig. S12:** FT-IR spectrums of (A) BD2/Uio-66-NH<sub>2</sub>, (B) BD4/Uio-66-NH<sub>2</sub>

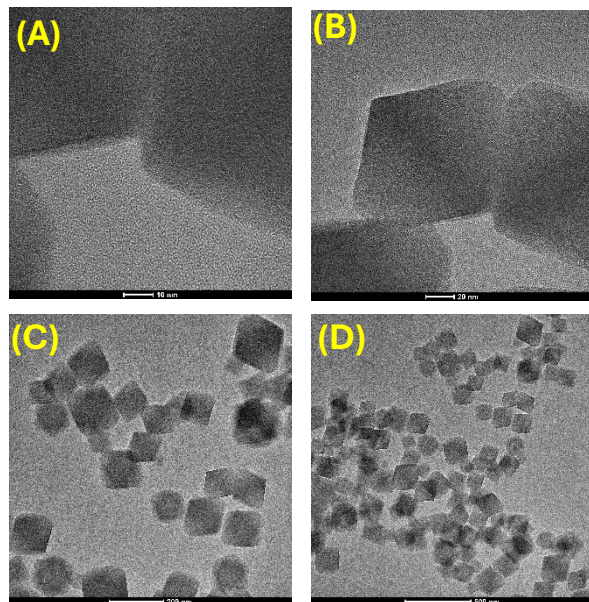

**Fig. S13:** HRTEM images of UiO-66-NH<sub>2</sub> (A) 10 nm, (B) 20 nm, (C) 200 nm, (D) 500 nm.

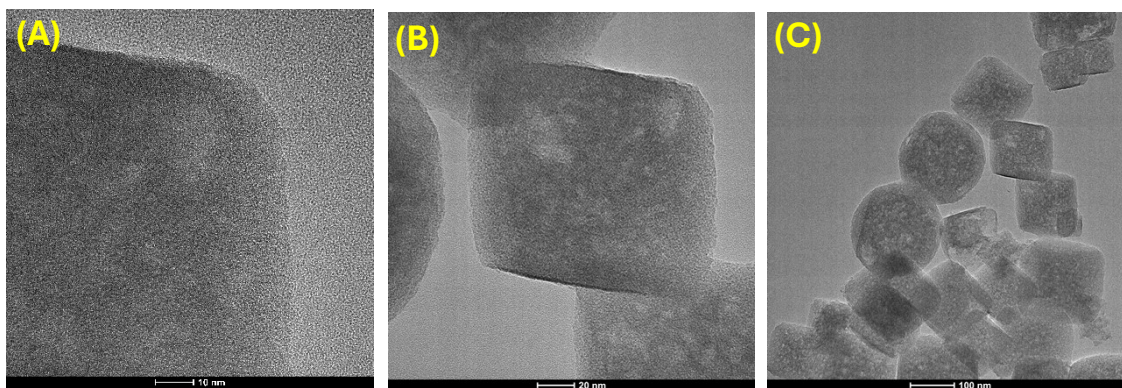

**Fig. S14:** HRTEM images of BD4/UiO-66-NH<sub>2</sub> (A) 10 nm, (B) 20 nm, (C) 100 nm.

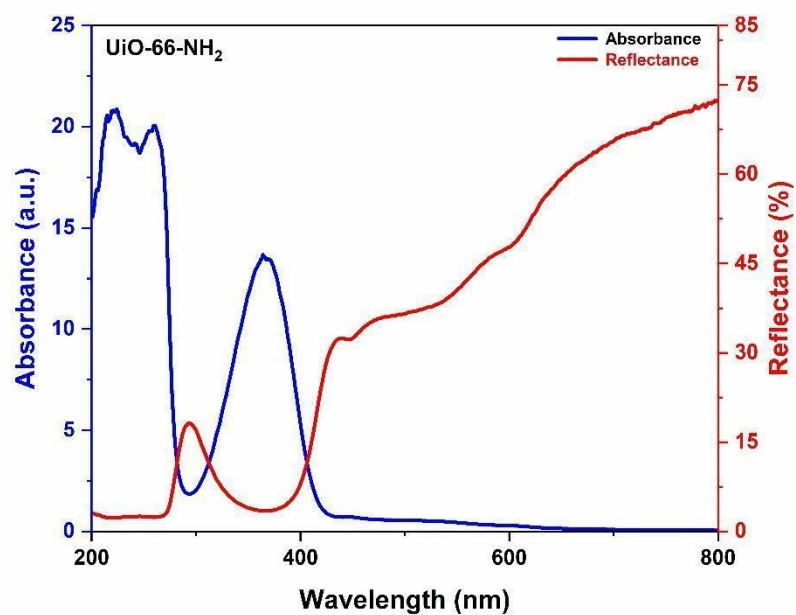

Fig. S15: Absorbance and reflectance spectrums of UiO-66-NH<sub>2</sub>.

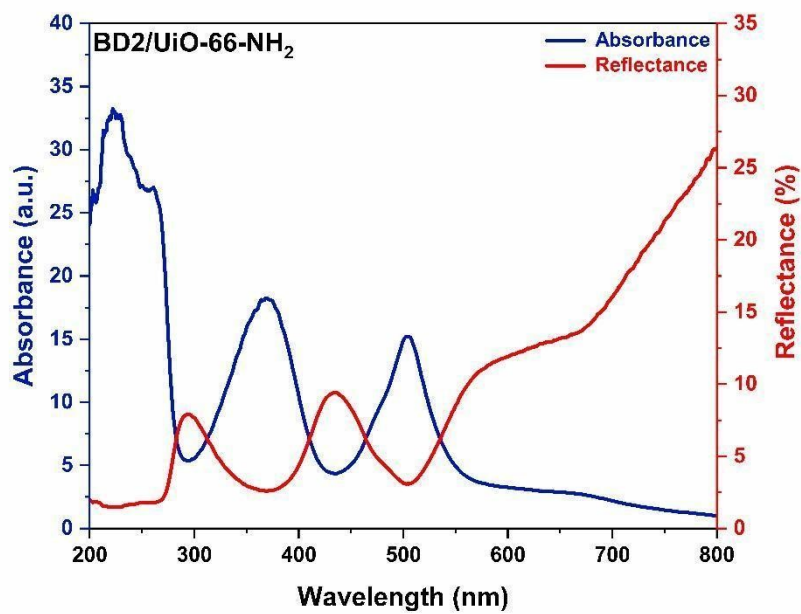

Fig. S16: Absorbance and reflectance spectrums of BD2/UiO-66-NH<sub>2</sub>.

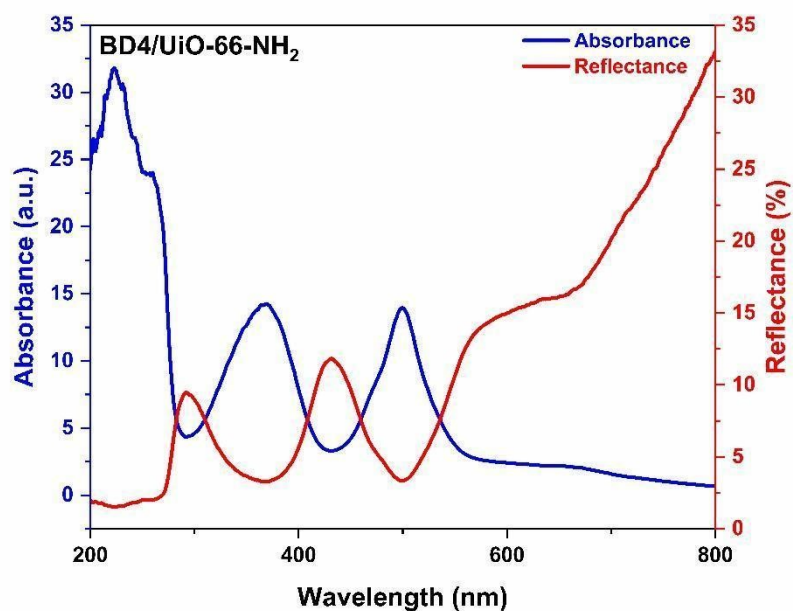

Fig. S17: Absorbance and reflectance spectrums of BD4/UiO-66-NH<sub>2</sub>.

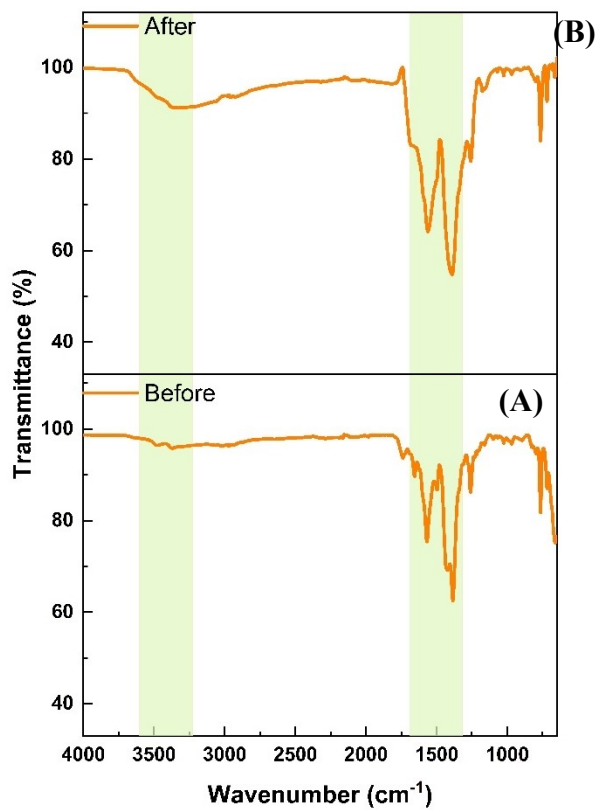

Fig. S18: FTIR spectra of BD4/UiO-66-NH<sub>2</sub> (A) before, (B) after HER

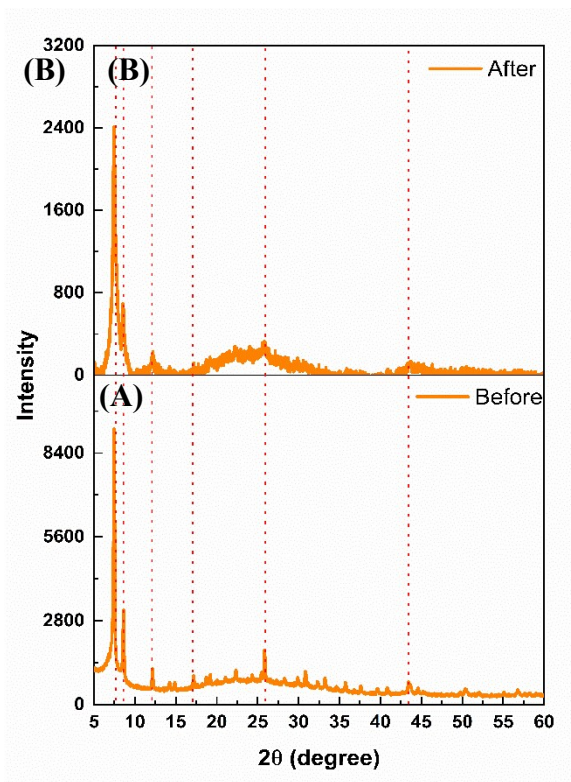

**Fig. S19:** PXR D pattern of BD4/Uio-66-NH<sub>2</sub> (A) before, (B) after HER

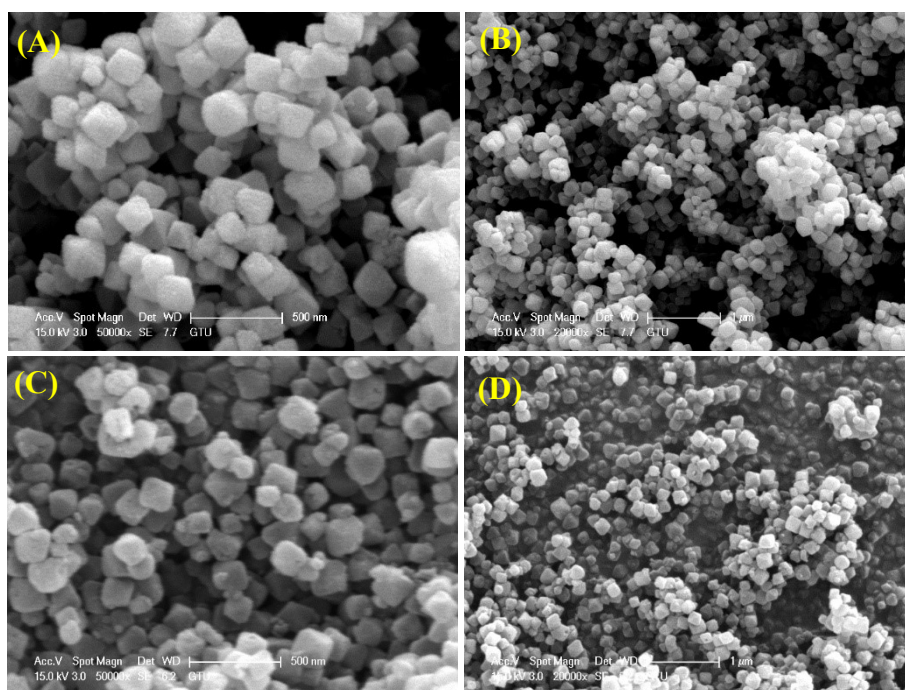

**Fig. S20:** SEM images of BD4/Uio-66-NH<sub>2</sub> (A, B) before, (C, D) after HER

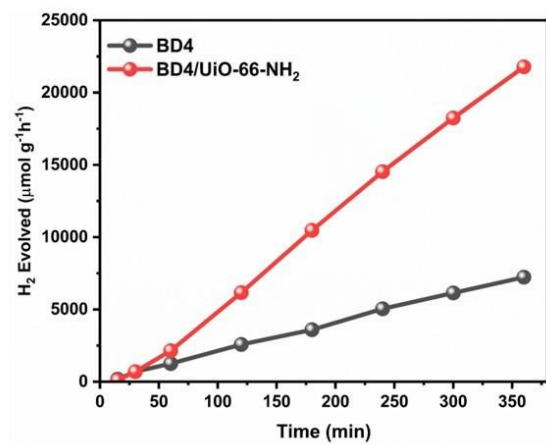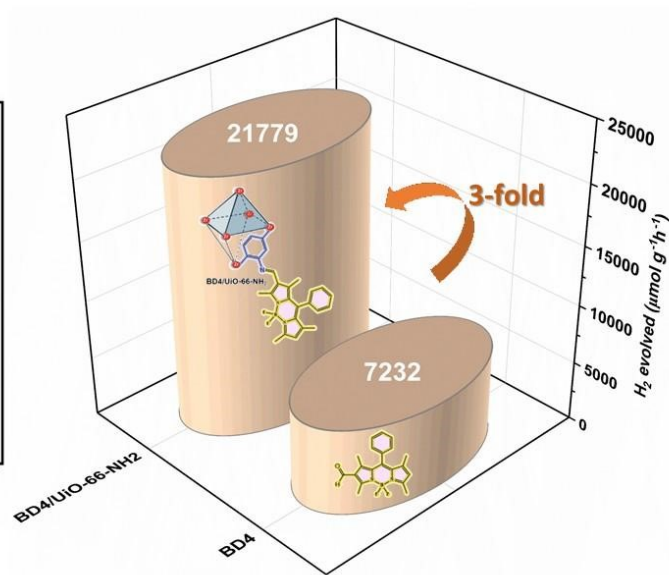

**Fig. S21:** H<sub>2</sub> Evolution Comparison of BD4 and BD4/Uio-66-NH<sub>2</sub>
